# Supplementary material for: Cerebellar atrophy and its contribution to motor and cognitive performance in multiple system atrophy
Source: PubMed Central journal article supplement — Neuroimage Clin. 2019 Jun 6;23:101891. doi: 10.1016/j.nicl.2019.101891 (PMC6587071; doi:10.1016/j.nicl.2019.101891), 2019-06-06
Supplement: mmc1.pdf [file mmc1.pdf]

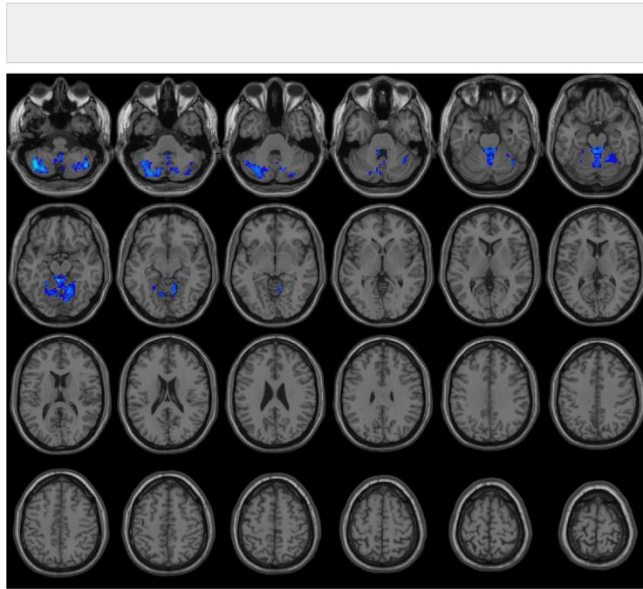

**Fig 1** Brain maps for GM difference between the MSAc and HC groups. Blue color denotes decreased GM volume in MSAc than HC group.

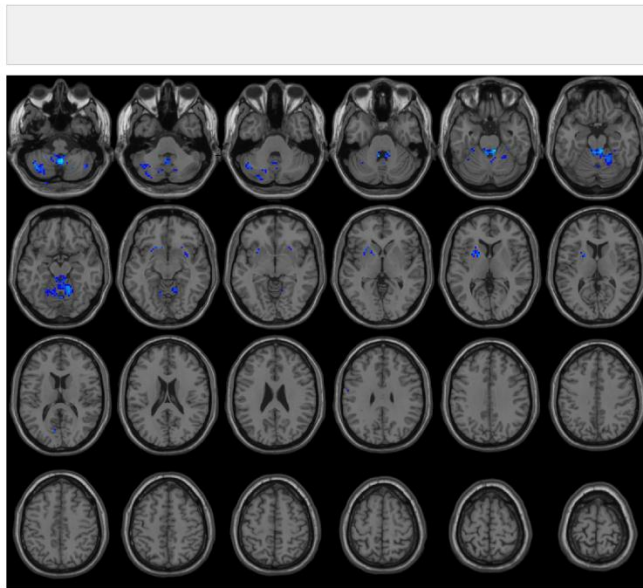

**Fig 2** Brain maps for GM difference between the MSAp and HC groups. Blue color denotes decreased GM volume in MSAp than HC group.

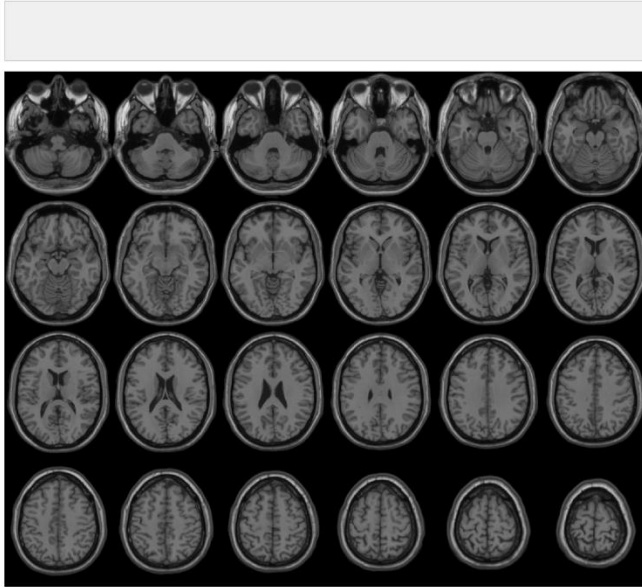

**Fig 3** Brain maps for GM difference between the MSAc and MSAp groups.
